# Supplementary material for: Effect of side chains on color purities of mono-triphenylamine-functionalized polyspirobifluorenes for pure blue polymer light-emitting diodes
Source: Royal Society of Chemistry journal article supplement (doi:10.1039/c8py01480a), 2018-12-05
Supplement: c8py01480a1.pdf [file c8py01480a1.pdf]

## Supporting Information

### Effect of Side Chains on Color Purities of Mono-triphenylamine-functionalized polyspirobifluorenes for pure blue polymer light-emitting diodes

Guangrong Jin,<sup>a</sup> Shaoshan Lian,<sup>a</sup> Yajuan Pan,<sup>a</sup> Zilong Wu,<sup>a</sup> Dehua Hu,<sup>a</sup> Yueqi Mo,<sup>\*a</sup>

LinLin Liu,<sup>\*a</sup> Zengqi Xie,<sup>a</sup> and Yuguang Ma<sup>\*a</sup>

College of Materials Science and Engineering, State Key Laboratory of  
Luminescent Materials and Device, South China University of Technology,  
Guangzhou, 510640, China.

E-mail: pomoy@scut.edu.cn, mslull@scut.edu.cn, ygma@scut.edu.cn,

### Content

Page S2–S11: <sup>1</sup>H and <sup>13</sup>C NMR spectra of monomers and polymers.

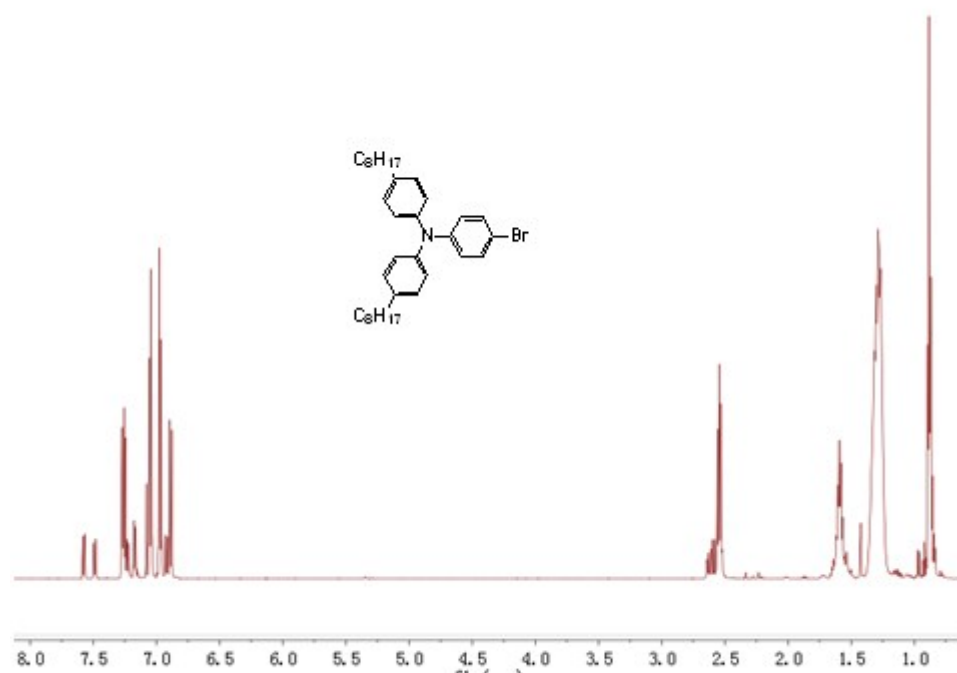

Fig S1. <sup>1</sup>H NMR of *4-bromo-N,N-bis(4-octylphenyl)aniline (C1)*

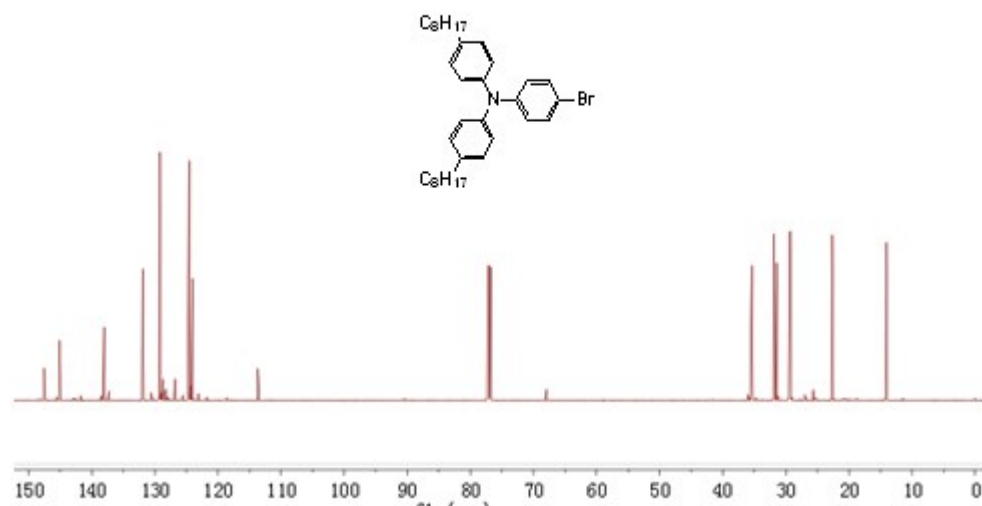

Fig S2. <sup>13</sup>C NMR of *4-bromo-N,N-bis(4-octylphenyl)aniline (C1)*

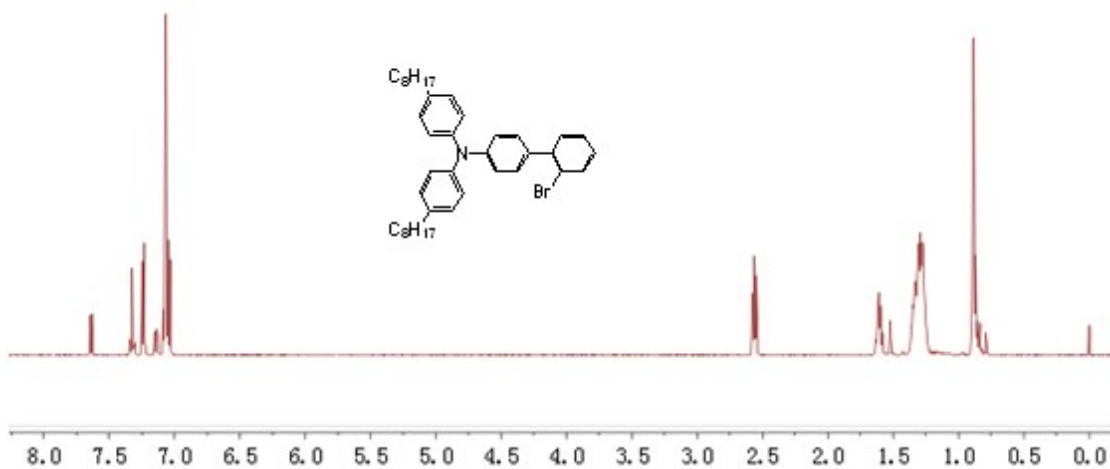

Fig S3. <sup>1</sup>H NMR of (2-Bromo-biphenyl-4-yl)-di(4-octylphenyl)-amine (C3)

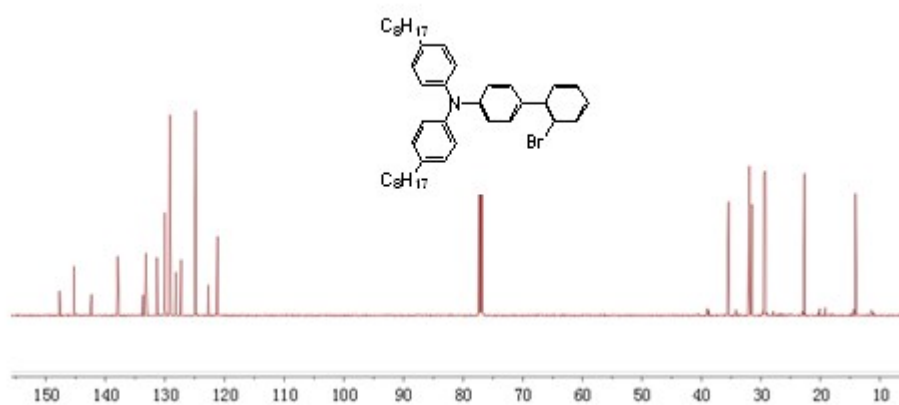

Fig S4. <sup>13</sup>C NMR of (2-Bromo-biphenyl-4-yl)-di(4-octylphenyl)-amine (C3)

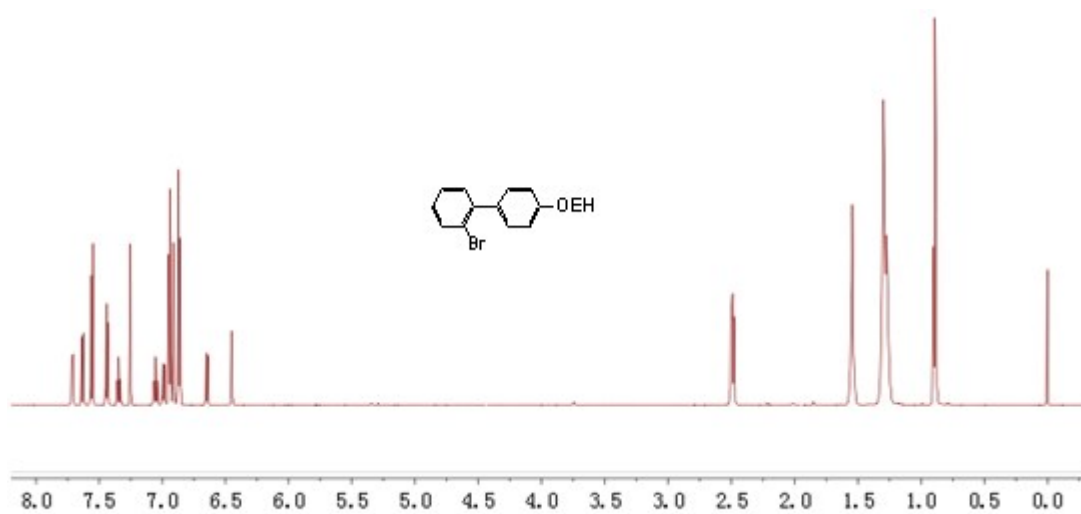

Fig S5. <sup>1</sup>H NMR of *2-bromo-4'-(2-ethylhexyl)oxy)-1,1'-biphenyl (C5)*

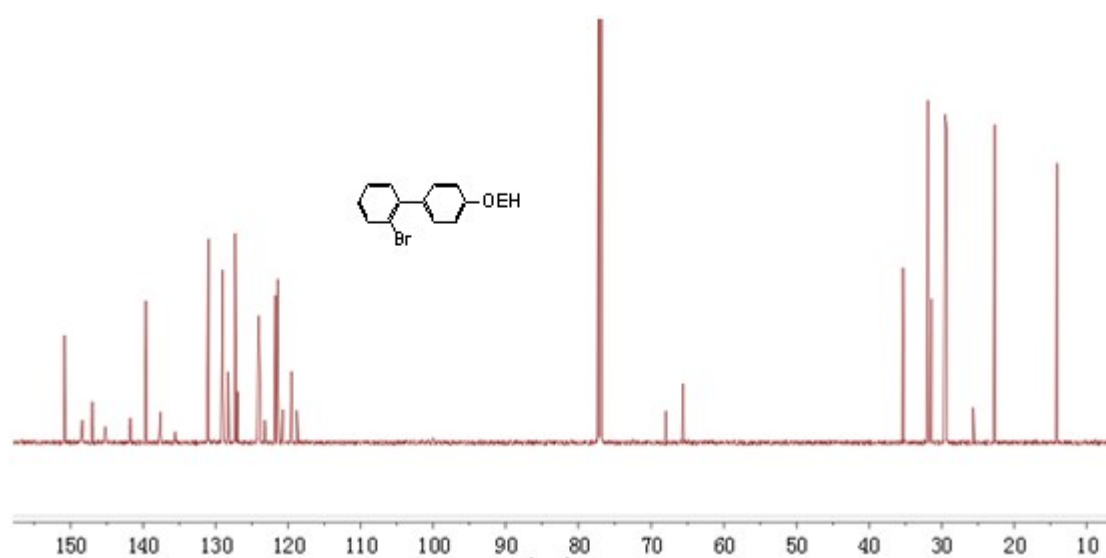

Fig S6. <sup>13</sup>C NMR of *2-bromo-4'-(2-ethylhexyl)oxy)-1,1'-biphenyl (C5)*

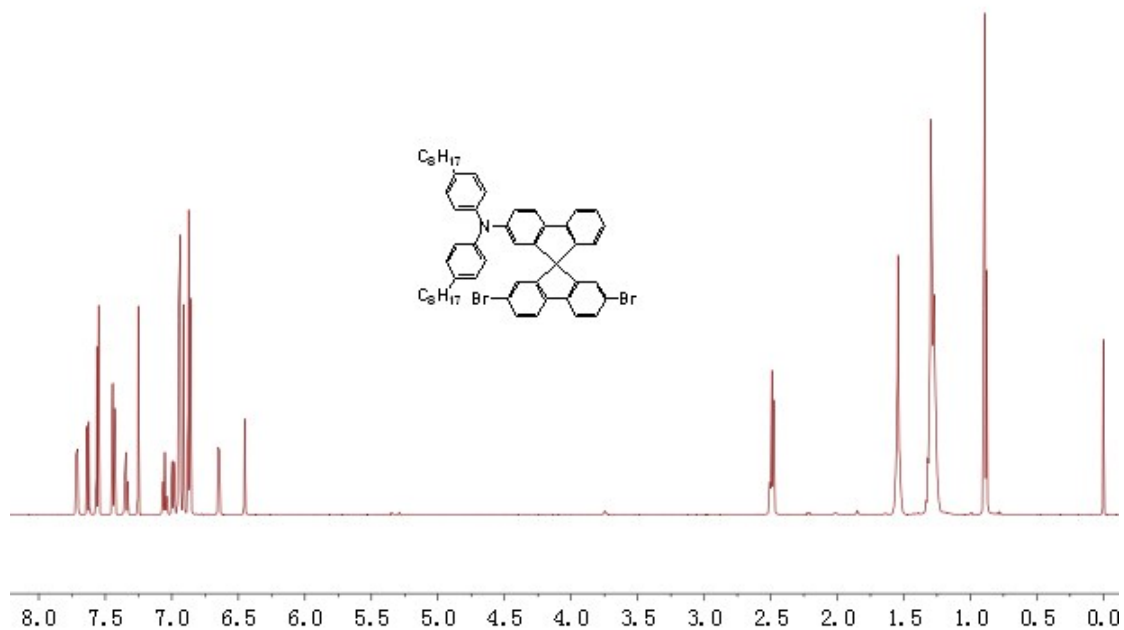

Fig S7. <sup>1</sup>H NMR of 2',7'-dibromo-N,N-bis(4-octylphenyl)-9,9'-  
spirobifluoren-2-amine (M1)

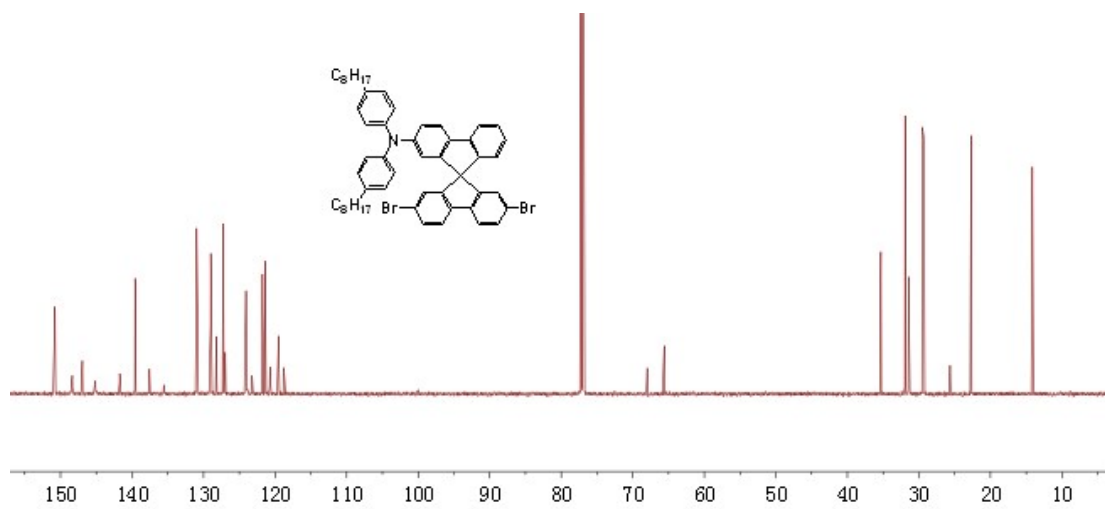

Fig S8. <sup>13</sup>C NMR of 2',7'-dibromo-N,N-bis(4-octylphenyl)-9,9'-  
spirobifluoren-2-amine (M1)

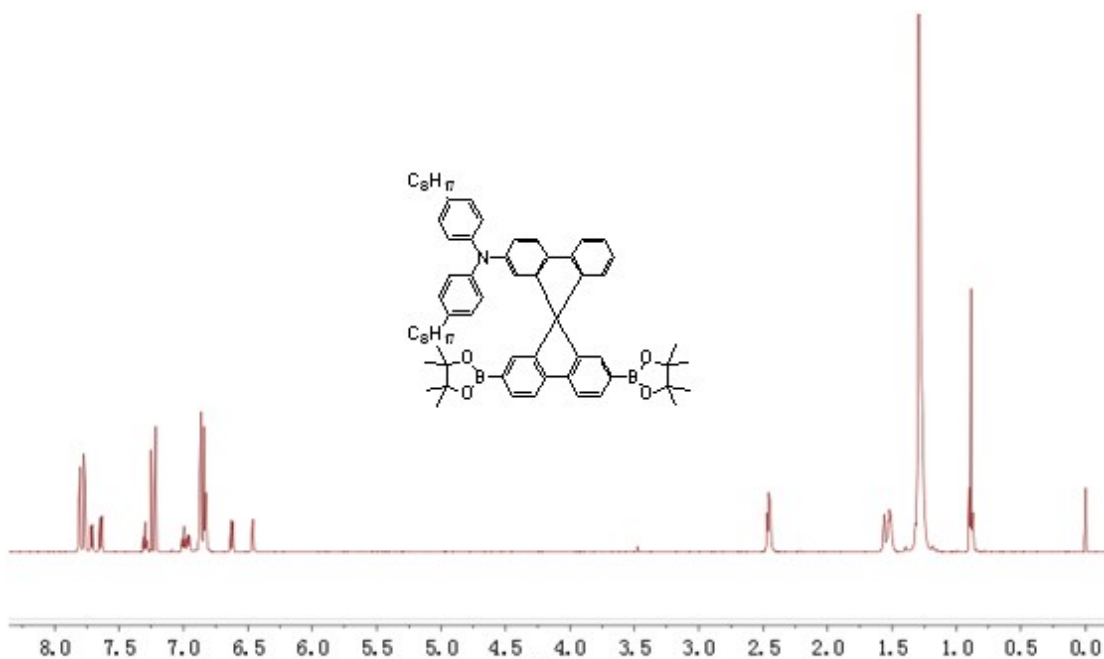

Fig S9.  $^1\text{H}$  NMR of *N,N*-bis(4-octylphenyl)-2',7'-bis(4,4,5,5-tetramethyl-1,3,2-dioxaborolan-2-yl)-9,9'-spirobifluorene-2-amine (M2)

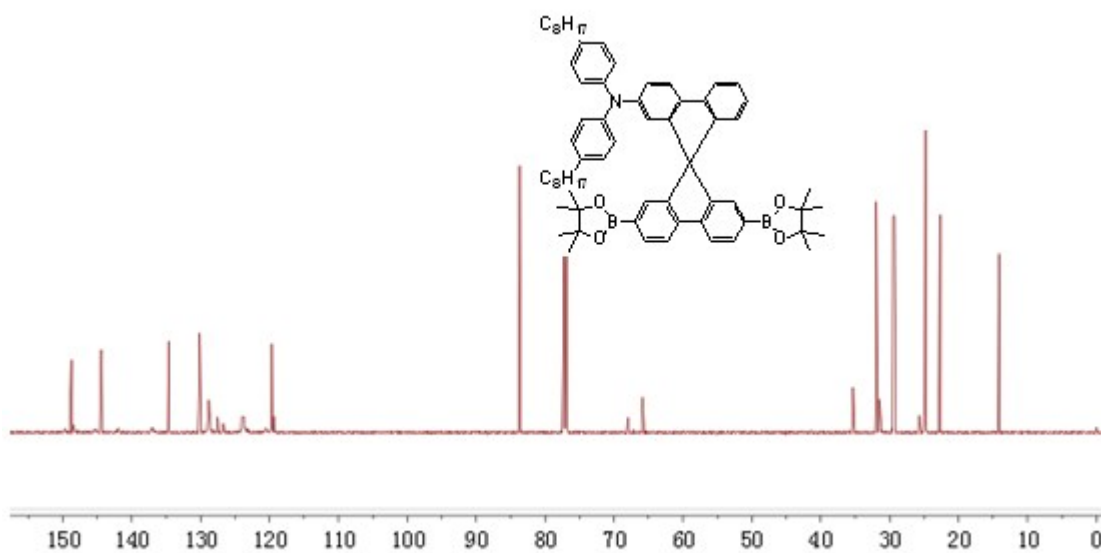

Fig S10.  $^{13}\text{C}$  NMR of *N,N*-bis(4-octylphenyl)-2',7'-bis(4,4,5,5-tetramethyl-1,3,2-dioxaborolan-2-yl)-9,9'-spirobifluorene-2-amine (M2)

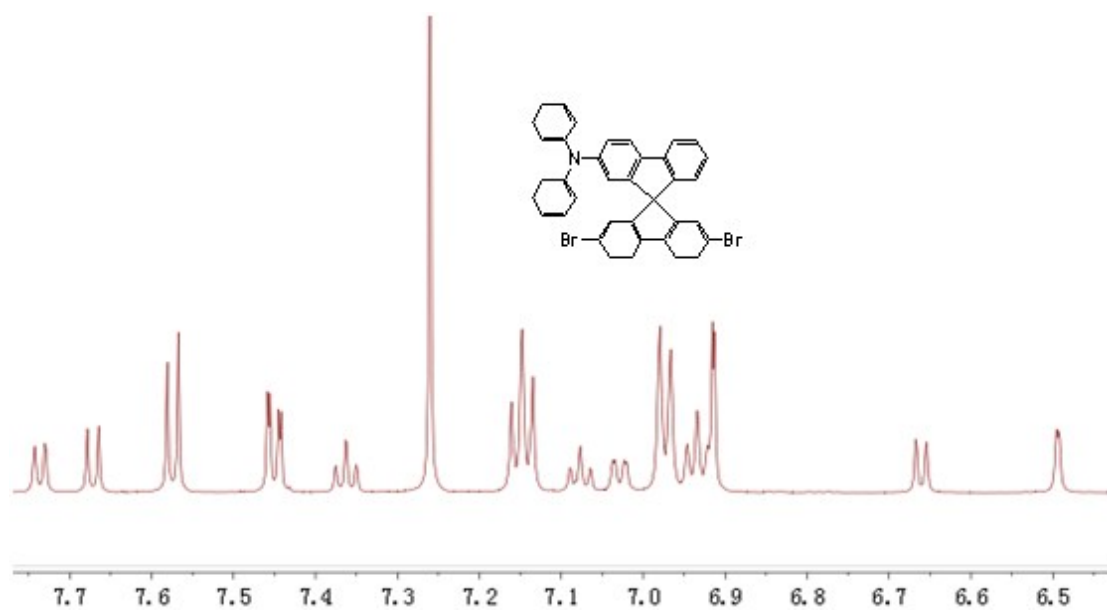

Fig S11. <sup>1</sup>H NMR of 2,7-dibromo-N,N-diphenyl-9,9'-spirobifluoren-2-amine (M3)

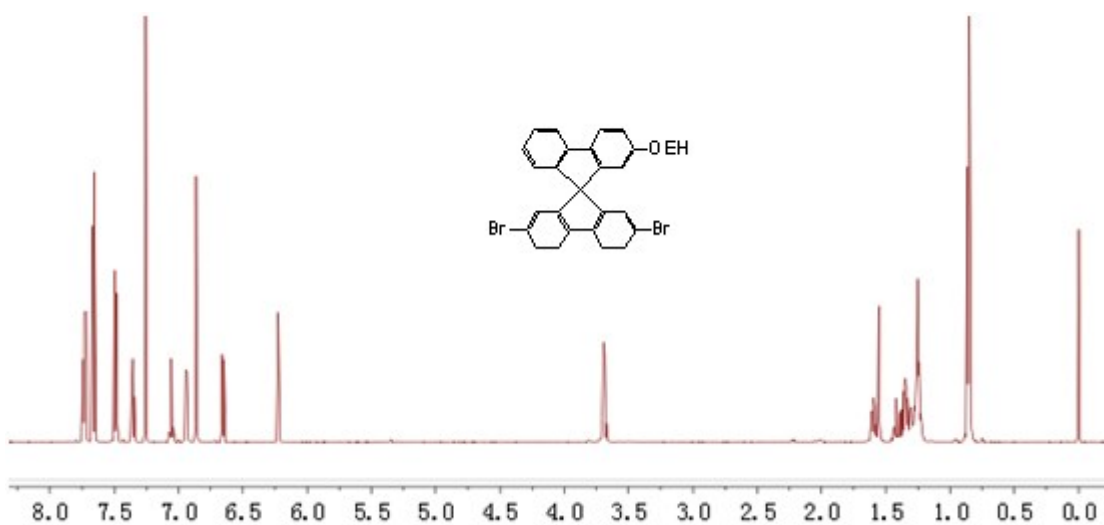

Fig S12. <sup>1</sup>H NMR of 2,7-dibromo-2'-(2-ethylhexyloxy)-9,9'-spirobifluorene (*M4*)

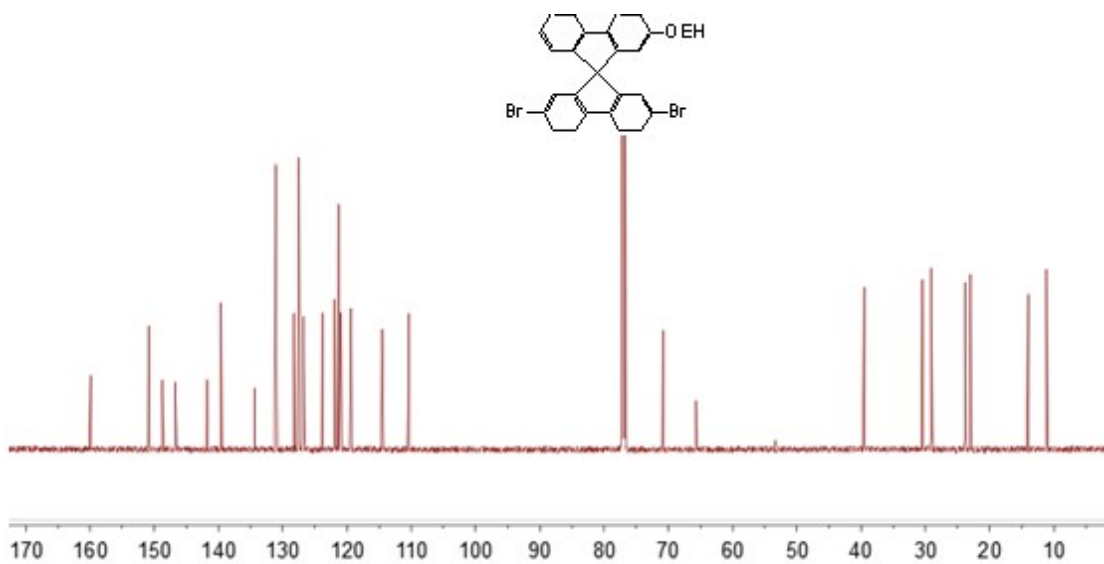

Fig S13. <sup>13</sup>C NMR of 2,7-dibromo-2'-(2-ethylhexyloxy)-9,9'-spirobifluorene (*M4*)



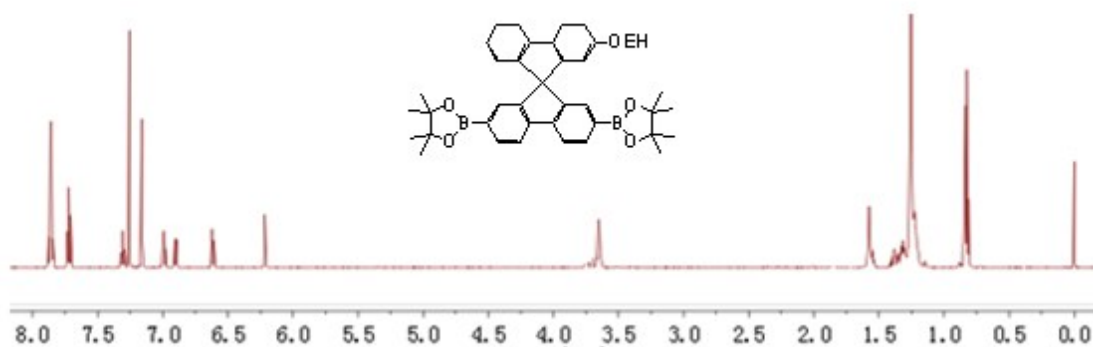

Fig S14. <sup>1</sup>H NMR of 2,7-bis(4,4,5,5-tetramethyl-1,3,2-dioxaborolan-2-yl)-2'-(2-ethylhexyloxy)-9,9'-spirobifluorene (M5)

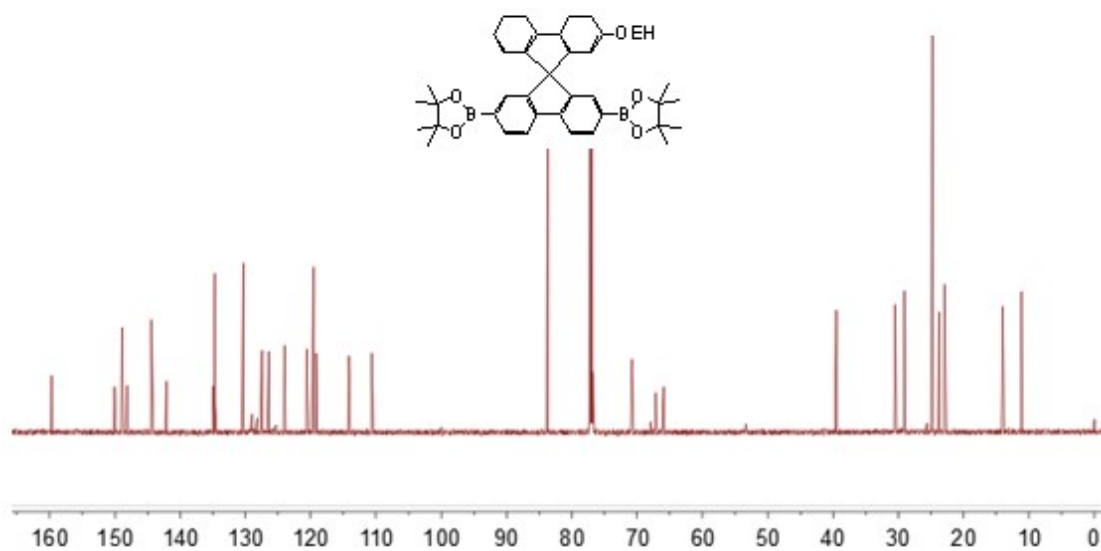

Fig S15. <sup>13</sup>C NMR of 2,7-bis(4,4,5,5-tetramethyl-1,3,2-dioxaborolan-2-yl)-2'-(2-ethylhexyloxy)-9,9'-spirobifluorene (M5)

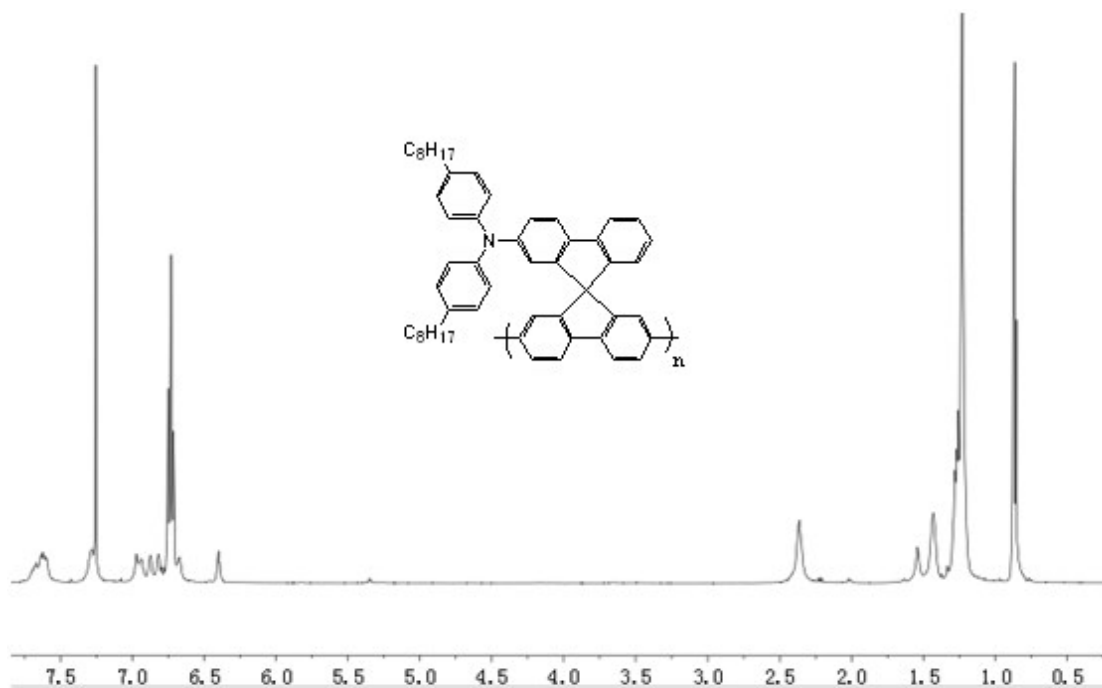

Fig S16. <sup>1</sup>H NMR of *Poly(N,N-bis(4-octylphenyl)-9,9'-spirobifluoren-2-amine)* (C8T-PsF)

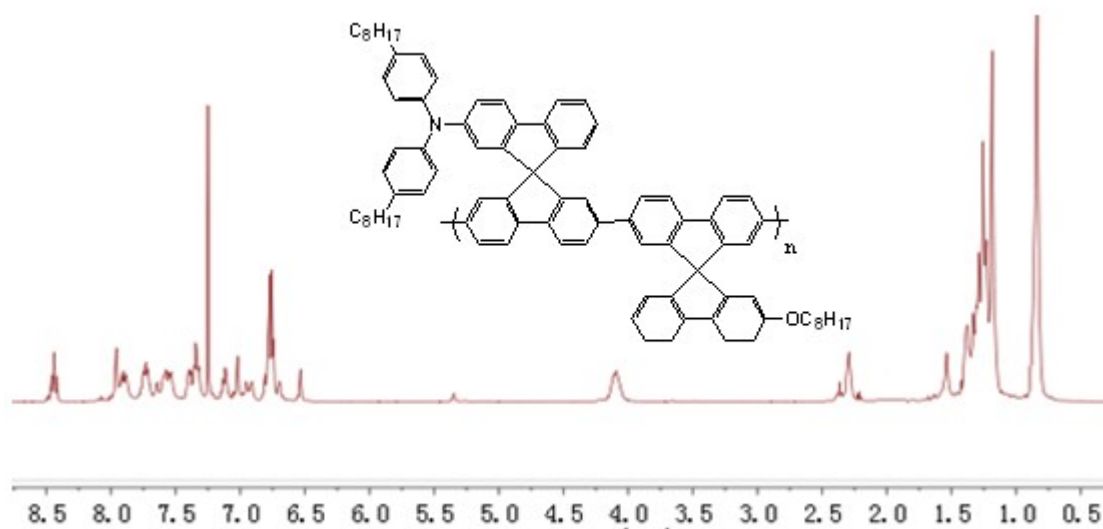

Fig S17. <sup>1</sup>H NMR of *Poly(N,N-bis(4-octylphenyl)-9,9'-spirobifluoren-2-amine-alt-2'-ethylhexyl-9,9'-spirobifluorene)* (C8T-alt-mO-PsF)

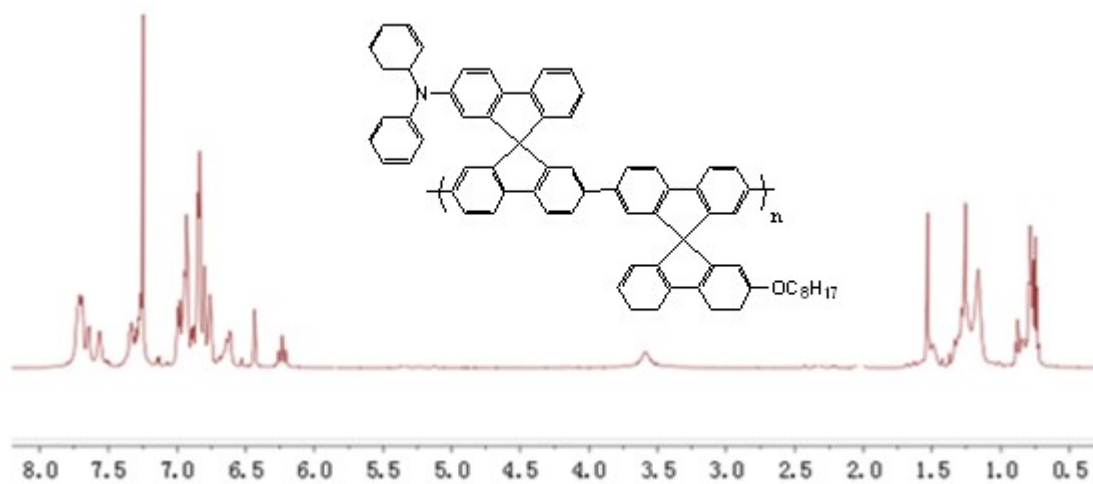

Fig S18. <sup>1</sup>H NMR of *Poly(N,N-bisphenyl-9,9'-spirobifluoren-2-amine-alt-2'-ethylhexyl-9,9'-spirobifluorene)* (*T-alt-mO-PsF*)

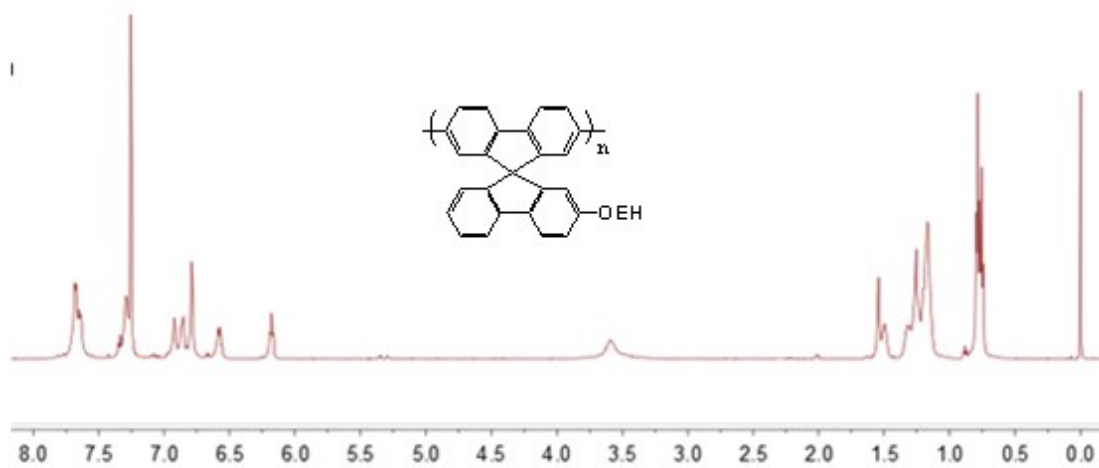

Fig S19. <sup>1</sup>H NMR of *Poly(2'-ethylhexyl-9,9'-spirobifluorene)* (*mO-PsF*)
